# Supplementary material for: Phylogeography of the California sheephead, Semicossyphus pulcher: the role of deep reefs as stepping stones and pathways to antitropicality
Source: PubMed Central journal article supplement (PMC3856754; doi:10.1002/ece3.840), 2013-10-21

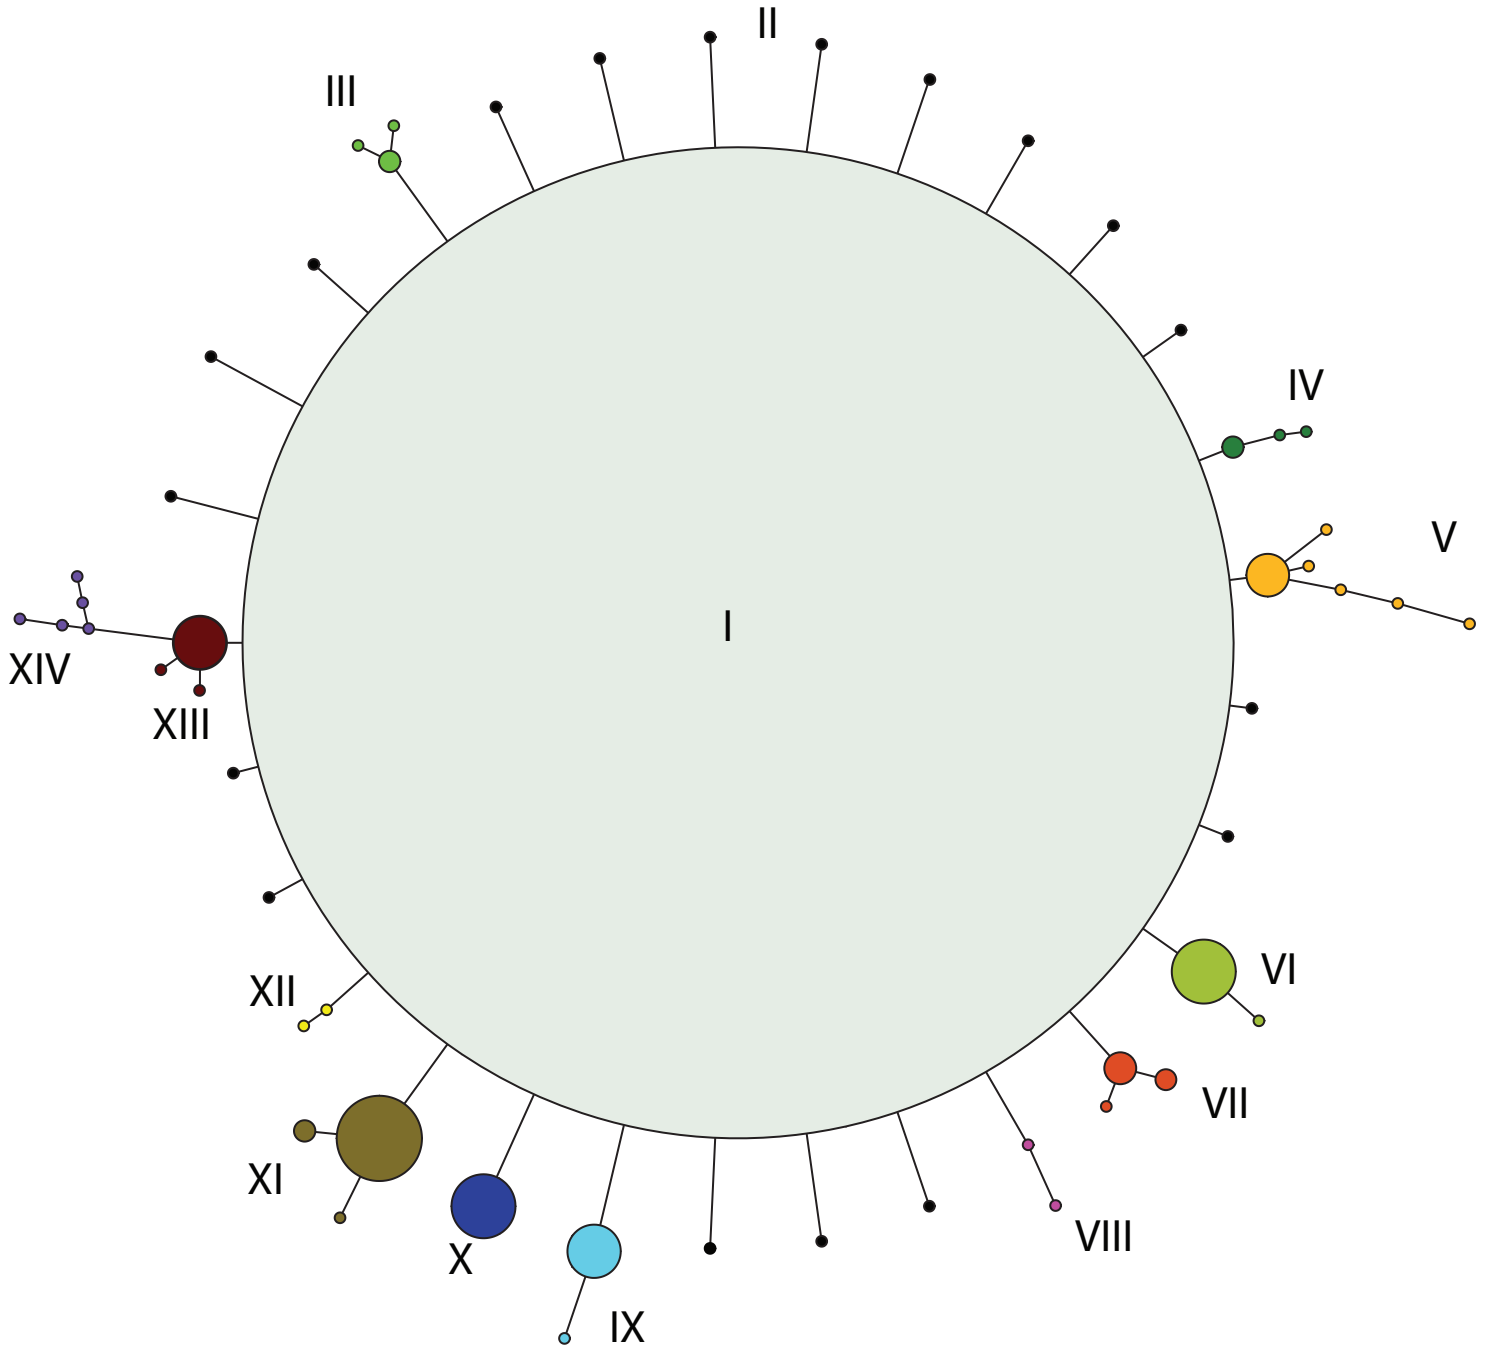

Supplement: ece30003-4558-SD1.pdf [file ece30003-4558-SD1.pdf]
